# Supplementary material
Source: publisher figshare collection journal article supplement (https://tandf.figshare.com/ndownloader/files/31581159)
Supplement: Supplementary file 1 [file 31581159]

## Appendix A

Figure A1. The number of consolidation cases in China (2000-2008)

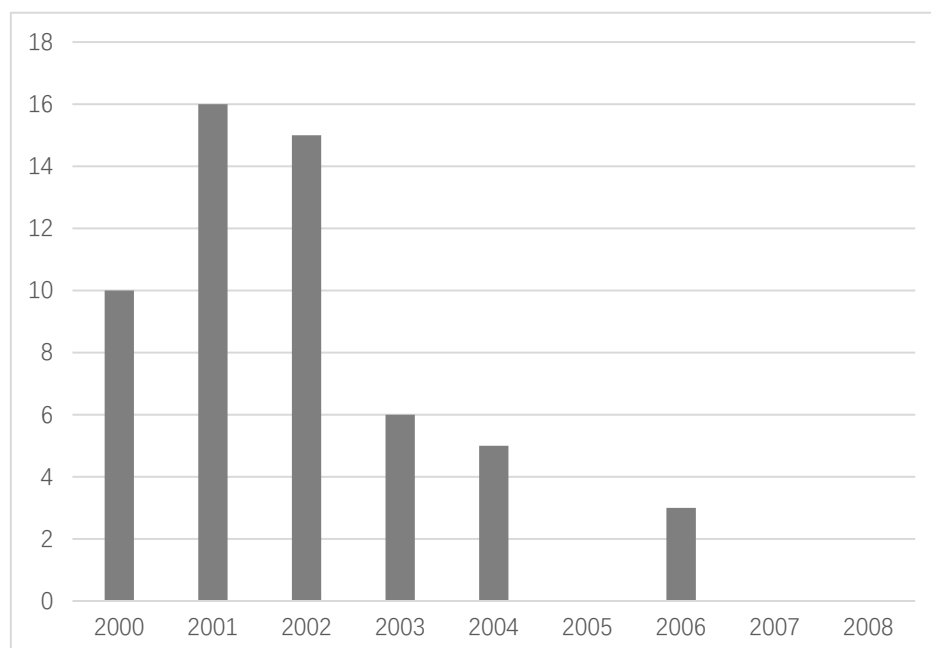

Note: The figure displays the annual number of consolidations from 2000 to 2008.

Figure A2. The distribution of “city-county consolidation” across China (2000-2008)

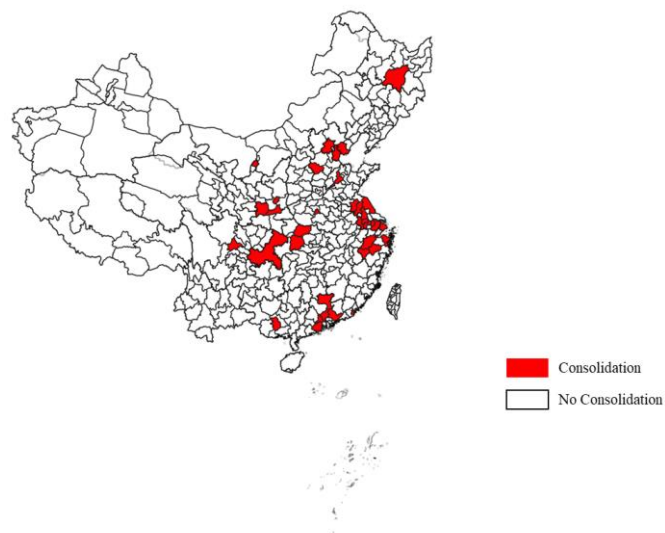

Note: The figure displays the prefectures where “city-county consolidation” occurred from 2000 to 2008.

Figure A3. Coefficient paths and cross-validation of LASSO

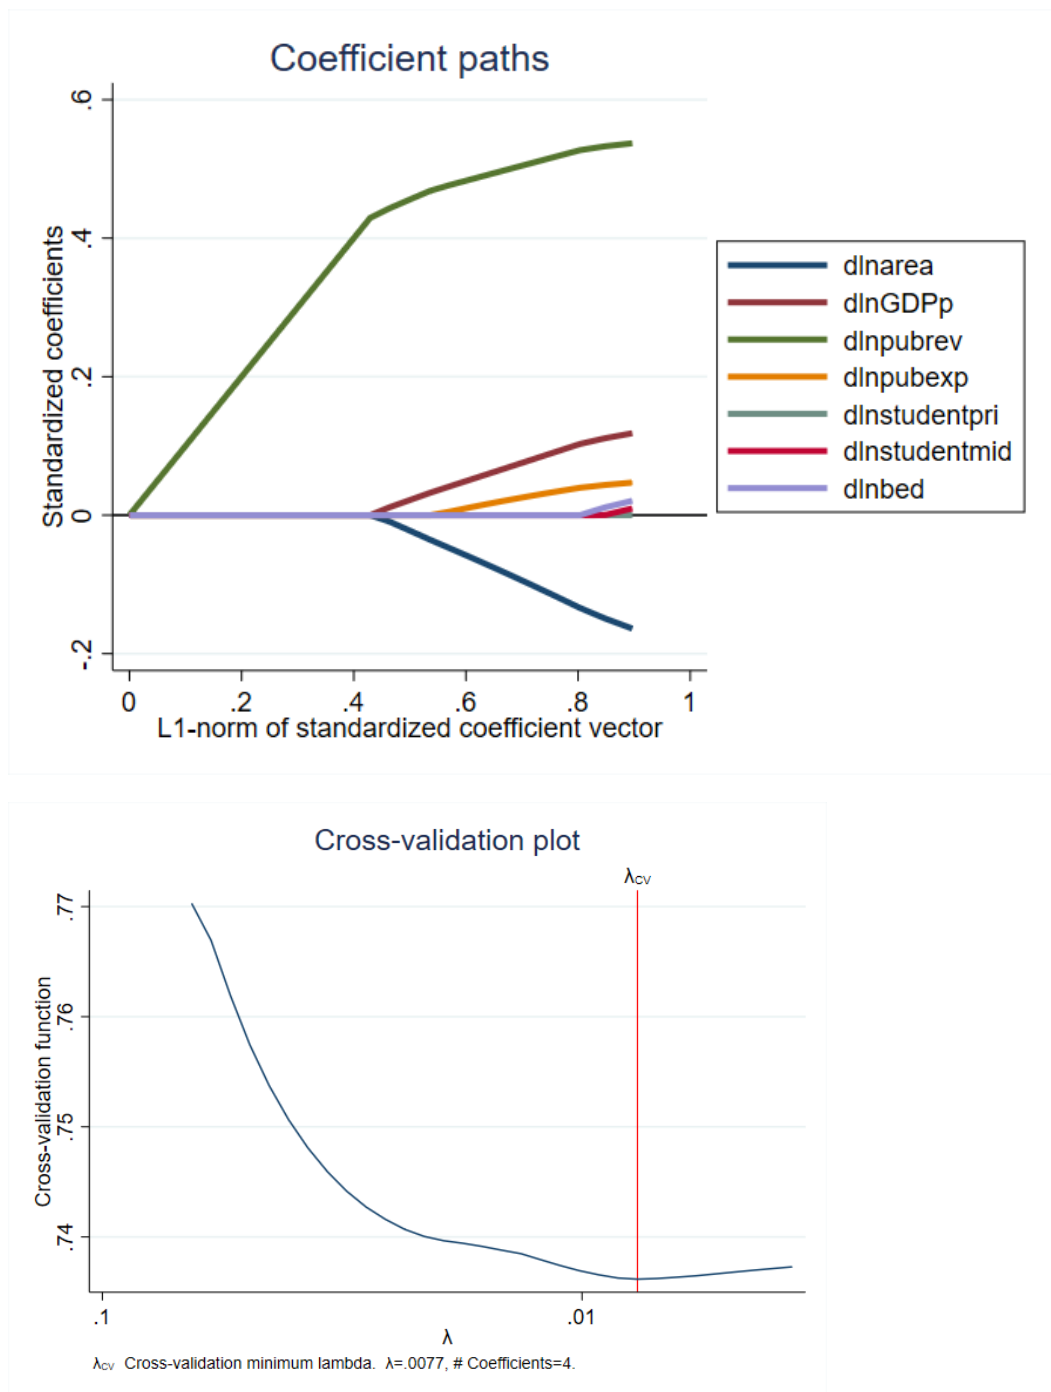

Note: The figures provide the coefficient paths for each regressor and the cross-validation plot.

The results suggest that 4 regressors (average change of: area, GDP per capita, government revenue, government expenditure) are left to estimate propensity score according to LASSO.

Figure A4. The distribution of propensity score by groups

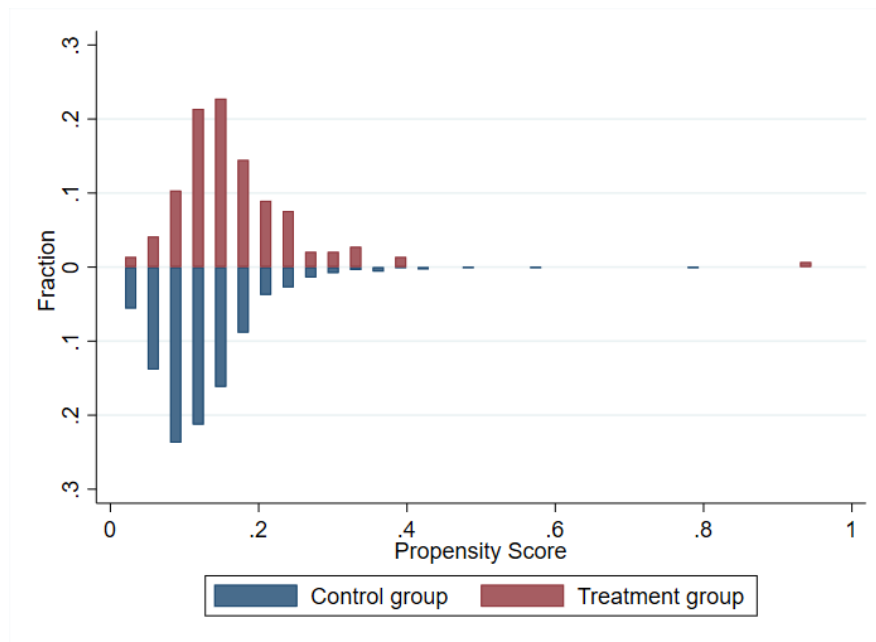

Note: The figure provides the distribution of propensity scores for the treatment and control groups.

Figure A5. The distribution of propensity score by groups (prefecture)

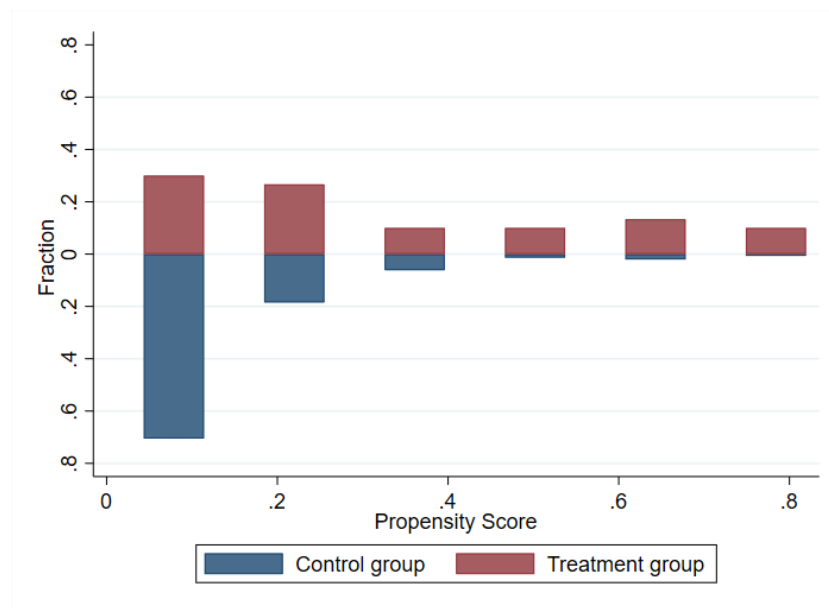

Note: The figure provides the distribution of propensity score for the treatment group and the control group.

Figure A6. Goodman-Bacon Decomposition without controls

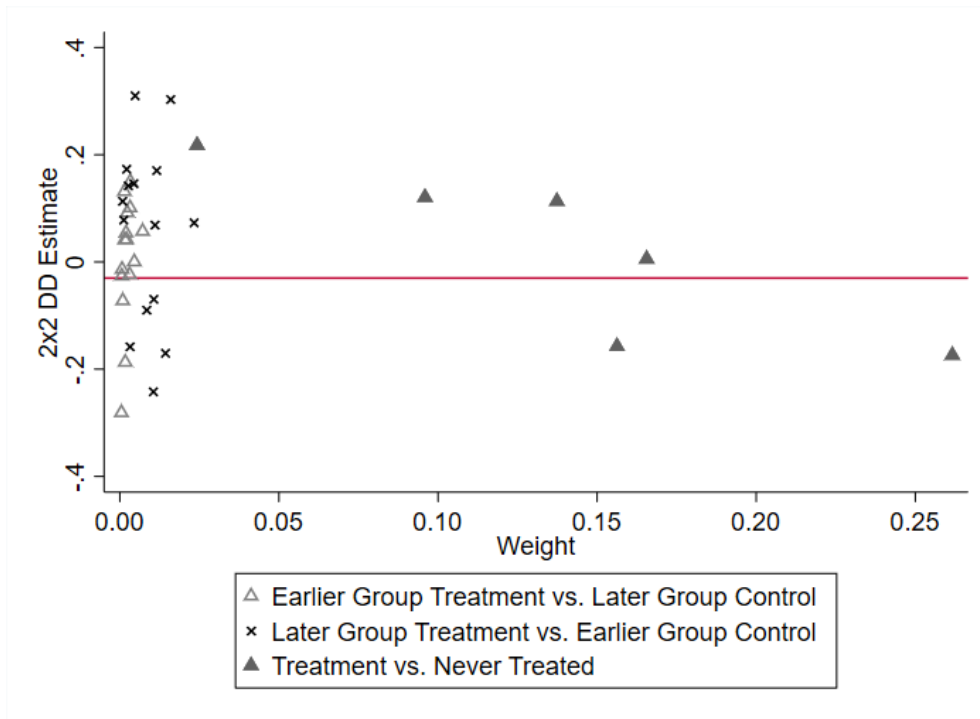

Note: According to the difference-in-difference decomposition theorem proposed by Goodman-bacon (2018), when the treated units receive treatment at different times, the general two-way fixed effects DiD estimator is a weighted average of all possible 2\*2 DiD estimators. The figure plots each 2\*2 difference-in-difference estimator and their weight in the data. The closed triangles are terms in which one treated unit acts as the treatment group and the never treated unit acts as the control group. The open triangles are terms that an earlier treated unit act as the treatment group and a later treated unit acts as the control group. The x symbols are terms that a later treated unit act as the treatment group and an earlier treated unit acts as the control group. The average difference-in-difference estimate is -0.030, which is indicated by the red line. The overall treatment effect is the average of the y-axis values weighted by their x-axis values. According to Goodman-bacon, the overall estimates is biased by the coefficients of x symbols.

Table A1 Summary statistics (counties)

| Definition                   | Total     |          | Control Group |          | Treatment group |          |
|------------------------------|-----------|----------|---------------|----------|-----------------|----------|
|                              | (N=22740) |          | (N=19820)     |          | (N=2920)        |          |
| GDP per capita               | 17059.59  | 21185.66 | 15317.62      | 17492.3  | 28892.22        | 35481.45 |
| Area                         | 2128.084  | 2000.386 | 2176.649      | 2079.869 | 1797.516        | 1292.068 |
| Government expenditure (RMB) | 1.13E+09  | 1.48E+09 | 1.05E+09      | 1.25E+09 | 1.66E+09        | 2.48E+09 |
| Government revenue (RMB)     | 4.94E+08  | 1.12E+09 | 4.08E+08      | 7.45E+08 | 1.07E+09        | 2.36E+09 |
| # of primary students        | 45804.98  | 37257.84 | 46333.6       | 38497.42 | 42256.37        | 27268.88 |
| # of middle students         | 31225.79  | 22090.13 | 31195.06      | 22595.97 | 31431.66        | 18348.01 |
| # of hospital beds           | 1040.453  | 765.5778 | 999.9442      | 724.1624 | 1309.211        | 955.3404 |

Source: China County Statistics, China Data Online (<https://www.china-data-online.com>)

Table A2. Summary statistics (prefecture)

| Definition                               | Total    |          | Control Group |          | Treatment group |          |
|------------------------------------------|----------|----------|---------------|----------|-----------------|----------|
|                                          | (N=4140) |          | (N=3540)      |          | (N=600)         |          |
| GDP per capita                           | 24340.57 | 23150.95 | 21777.27      | 19930.17 | 39424.77        | 32984.96 |
| Area (10,000 km <sup>2</sup> )           | 1.462157 | 1.475647 | 1.50847       | 1.547153 | 1.197402        | 0.92807  |
| Government expenditure (100 million RMB) | 142.4964 | 184.2281 | 121.0294      | 133.2814 | 267.3232        | 331.5311 |
| Government revenue (100 million RMB)     | 80.42939 | 146.9153 | 58.74075      | 88.42587 | 200.1783        | 284.1939 |
| # of primary students (10,000)           | 35.0321  | 24.14262 | 33.99861      | 24.38919 | 41.04355        | 21.719   |
| # of middle students (10,000)            | 24.44679 | 15.6405  | 23.58032      | 15.57729 | 29.4868         | 15.0569  |
| # of hospital beds (10,000)              | 1.328802 | 1.009864 | 1.201639      | 0.799158 | 2.05405         | 1.606    |

Source: China City Statistics Yearbook



Table A3. Prefecture level analysis

| VARIABLES                                    | (1)<br>Ln(GDP per<br>capita) | (2)<br>Ln(GDP per<br>capita) | (3)<br>Ln(GDP per<br>capita) | (4)<br>Ln(GDP per<br>capita) |
|----------------------------------------------|------------------------------|------------------------------|------------------------------|------------------------------|
| Treatment                                    | 0.00338<br>(0.0393)          |                              |                              |                              |
| Treat(-3)                                    |                              | 0.00308<br>(0.0256)          |                              |                              |
| Treat(-2)                                    |                              | -0.00793<br>(0.0205)         |                              |                              |
| Treat(-1)                                    |                              | -0.00175<br>(0.0108)         |                              |                              |
| Treat(+1)                                    |                              | -0.000405<br>(0.0127)        |                              |                              |
| Treat(+2)                                    |                              | -0.00694<br>(0.0225)         |                              |                              |
| Treat(+3)                                    |                              | -0.0187<br>(0.0305)          |                              |                              |
| Treat(+4)                                    |                              | -0.0192<br>(0.0368)          |                              |                              |
| Treat(+5)                                    |                              | -0.00505<br>(0.0427)         |                              |                              |
| Treat(+6)                                    |                              | 0.000184<br>(0.0469)         |                              |                              |
| Treat(+7)                                    |                              | 0.0108<br>(0.0489)           |                              |                              |
| Treat(+8)                                    |                              | -0.0181<br>(0.0509)          |                              |                              |
| Treat(+9)                                    |                              | -0.0249<br>(0.0523)          |                              |                              |
| Treat(+10)                                   |                              | 0.0339<br>(0.0531)           |                              |                              |
| Treat intensity (pop<br>share of urban core) |                              |                              | -0.0496<br>(0.0730)          |                              |
| Treat intensity (pop<br>share of prefecture) |                              |                              |                              | -0.0819<br>(0.104)           |
| County FE                                    | Y                            | Y                            | Y                            | Y                            |
| Year FE                                      | Y                            | Y                            | Y                            | Y                            |
| Controls                                     | Y                            | Y                            | Y                            | Y                            |
| Observations                                 | 1,119                        | 1,119                        | 1,119                        | 1,119                        |
| R-squared                                    | 0.982                        | 0.982                        | 0.982                        | 0.982                        |

Notes: The dependent variable is  $\ln(\text{GDP per-capita})$  of each rural county. Column (1) reports the base-DiD results. Column (2) includes the pre- and post-treatment-year indicators to assess pre-trends,  $\text{treat}(-t)$  means the indicator for  $t$  years before treatment, while  $\text{treat}(+t)$  means the indicator for  $t$  years after treatment. The years beyond -3 and +10 are grouped into -3 and +10 respectively. Column (3) shows the results of adding the treatment-intensity variable to the base model: i.e., ratio of the consolidated-county's(ies') population to the urban-core population before consolidation; Column (4) is the result of adding to the base model the treatment-intensity variable: i.e., ratio of the consolidated-county's population to the entire prefecture's population. Robust standard errors clustered at the county level are in parentheses. \*\*\*  $p < 0.01$ , \*\*  $p < 0.05$ , \*  $p < 0.1$ .

Table A4. Results of excluding neighbors of the treated prefectures

| VARIABLES                                    | (1)<br>Ln(GDP per<br>capita) | (2)<br>Ln(GDP per<br>capita) | (3)<br>Ln(GDP per<br>capita) | (4)<br>Ln(GDP per<br>capita) |
|----------------------------------------------|------------------------------|------------------------------|------------------------------|------------------------------|
| Treatment                                    | -0.0871***<br>(0.0306)       |                              |                              |                              |
| Treat(-3)                                    |                              | 0.0309<br>(0.0274)           |                              |                              |
| Treat(-2)                                    |                              | 0.0270<br>(0.0187)           |                              |                              |
| Treat(-1)                                    |                              | 0.00754<br>(0.0107)          |                              |                              |
| Treat(+1)                                    |                              | -0.0386***<br>(0.0134)       |                              |                              |
| Treat(+2)                                    |                              | -0.0246<br>(0.0159)          |                              |                              |
| Treat(+3)                                    |                              | -0.0574***<br>(0.0210)       |                              |                              |
| Treat(+4)                                    |                              | -0.0973***<br>(0.0250)       |                              |                              |
| Treat(+5)                                    |                              | -0.103***<br>(0.0289)        |                              |                              |
| Treat(+6)                                    |                              | -0.104***<br>(0.0324)        |                              |                              |
| Treat(+7)                                    |                              | -0.119***<br>(0.0358)        |                              |                              |
| Treat(+8)                                    |                              | -0.117***<br>(0.0371)        |                              |                              |
| Treat(+9)                                    |                              | -0.110***<br>(0.0389)        |                              |                              |
| Treat(+10)                                   |                              | -0.0920**<br>(0.0403)        |                              |                              |
| Treat intensity (pop<br>share of urban core) |                              |                              | -0.289***<br>(0.0606)        |                              |
| Treat intensity (pop<br>share of prefecture) |                              |                              |                              | -0.560***<br>(0.145)         |
| County FE                                    | Y                            | Y                            | Y                            | Y                            |
| Year FE                                      | Y                            | Y                            | Y                            | Y                            |
| Controls                                     | Y                            | Y                            | Y                            | Y                            |
| Observations                                 | 4,684                        | 4,684                        | 4,684                        | 4,684                        |
| R-squared                                    | 0.968                        | 0.968                        | 0.968                        | 0.968                        |

Notes: The dependent variable is  $\ln(\text{GDP per-capita})$  of each rural county. Column (1) reports the base-DiD results. Column (2) includes the pre- and post-treatment-year indicators to assess pre-trends,  $\text{treat}(-t)$  means the indicator for  $t$  years before treatment, while  $\text{treat}(+t)$  means the indicator for  $t$  years after treatment. The years beyond -3 and +10 are grouped into -3 and +10 respectively. Column (3) shows the results of adding the treatment-intensity variable to the base model: i.e., ratio of the consolidated-county's(ies') population to the urban-core population before consolidation; Column (4) is the result of adding to the base model the treatment-intensity variable: i.e., ratio of the consolidated-county's population to the entire prefecture's population. Robust standard errors clustered at the county level are in parentheses. \*\*\*  $p < 0.01$ , \*\*  $p < 0.05$ , \*  $p < 0.1$ .

Table A5. Results of using caliper matching approach

| VARIABLES                                    | (1)<br>Ln(GDP per<br>capita) | (2)<br>Ln(GDP per<br>capita) | (3)<br>Ln(GDP per<br>capita) | (4)<br>Ln(GDP per<br>capita) |
|----------------------------------------------|------------------------------|------------------------------|------------------------------|------------------------------|
| Treatment                                    | -0.0616***<br>(0.0220)       |                              |                              |                              |
| Treat(-3)                                    |                              | 0.0194<br>(0.0221)           |                              |                              |
| Treat(-2)                                    |                              | 0.0149<br>(0.0156)           |                              |                              |
| Treat(-1)                                    |                              | 0.000187<br>(0.00919)        |                              |                              |
| Treat(+1)                                    |                              | -0.0314***<br>(0.0120)       |                              |                              |
| Treat(+2)                                    |                              | -0.0139<br>(0.0126)          |                              |                              |
| Treat(+3)                                    |                              | -0.0431***<br>(0.0157)       |                              |                              |
| Treat(+4)                                    |                              | -0.0821***<br>(0.0178)       |                              |                              |
| Treat(+5)                                    |                              | -0.0848***<br>(0.0199)       |                              |                              |
| Treat(+6)                                    |                              | -0.0807***<br>(0.0218)       |                              |                              |
| Treat(+7)                                    |                              | -0.0906***<br>(0.0247)       |                              |                              |
| Treat(+8)                                    |                              | -0.0889***<br>(0.0252)       |                              |                              |
| Treat(+9)                                    |                              | -0.0809***<br>(0.0265)       |                              |                              |
| Treat(+10)                                   |                              | -0.0563**<br>(0.0276)        |                              |                              |
| Treat intensity (pop<br>share of urban core) |                              |                              | -0.230***<br>(0.0437)        |                              |
| Treat intensity (pop<br>share of prefecture) |                              |                              |                              | -0.470***<br>(0.121)         |
| County FE                                    | Y                            | Y                            | Y                            | Y                            |
| Year FE                                      | Y                            | Y                            | Y                            | Y                            |
| Controls                                     | Y                            | Y                            | Y                            | Y                            |
| Observations                                 | 22,408                       | 22,408                       | 22,408                       | 22,408                       |

|           |       |       |       |       |
|-----------|-------|-------|-------|-------|
| R-squared | 0.966 | 0.966 | 0.966 | 0.966 |
|-----------|-------|-------|-------|-------|

Notes: The dependent variable is ln(GDP per-capita) of each rural county. Column (1) reports the base-DiD results. Column (2) includes the pre- and post-treatment-year indicators to assess pre-trends, treat(-t) means the indicator for t years before treatment, while treat(+t) means the indicator for t years after treatment. The years beyond -3 and +10 are grouped into -3 and +10 respectively. Column (3) shows the results of adding the treatment-intensity variable to the base model: i.e., ratio of the consolidated-county's(ies') population to the urban-core population before consolidation; Column (4) is the result of adding to the base model the treatment-intensity variable: i.e., ratio of the consolidated-county's population to the entire prefecture's population. Robust standard errors clustered at the county level are in parentheses. \*\*\* p<0.01, \*\* p<0.05, \* p<0.1.

Table A6. Results of using kernel matching approach

| VARIABLES                                    | (1)<br>Ln(GDP per<br>capita) | (2)<br>Ln(GDP per<br>capita) | (3)<br>Ln(GDP per<br>capita) | (4)<br>Ln(GDP per<br>capita) |
|----------------------------------------------|------------------------------|------------------------------|------------------------------|------------------------------|
| Treatment                                    | -0.0675***<br>(0.0224)       |                              |                              |                              |
| Treat(-3)                                    |                              | 0.0248<br>(0.0222)           |                              |                              |
| Treat(-2)                                    |                              | 0.0171<br>(0.0158)           |                              |                              |
| Treat(-1)                                    |                              | 0.00139<br>(0.00926)         |                              |                              |
| Treat(+1)                                    |                              | -0.0326***<br>(0.0120)       |                              |                              |
| Treat(+2)                                    |                              | -0.0160<br>(0.0127)          |                              |                              |
| Treat(+3)                                    |                              | -0.0455***<br>(0.0158)       |                              |                              |
| Treat(+4)                                    |                              | -0.0844***<br>(0.0181)       |                              |                              |
| Treat(+5)                                    |                              | -0.0875***<br>(0.0203)       |                              |                              |
| Treat(+6)                                    |                              | -0.0839***<br>(0.0224)       |                              |                              |
| Treat(+7)                                    |                              | -0.0943***<br>(0.0254)       |                              |                              |
| Treat(+8)                                    |                              | -0.0925***<br>(0.0259)       |                              |                              |
| Treat(+9)                                    |                              | -0.0848***<br>(0.0273)       |                              |                              |
| Treat(+10)                                   |                              | -0.0591**<br>(0.0282)        |                              |                              |
| Treat intensity (pop<br>share of urban core) |                              |                              | -0.238***<br>(0.0443)        |                              |
| Treat intensity (pop<br>share of prefecture) |                              |                              |                              | -0.488***<br>(0.121)         |
| County FE                                    | Y                            | Y                            | Y                            | Y                            |
| Year FE                                      | Y                            | Y                            | Y                            | Y                            |
| Controls                                     | Y                            | Y                            | Y                            | Y                            |
| Observations                                 | 22,388                       | 22,388                       | 22,388                       | 22,388                       |
| R-squared                                    | 0.966                        | 0.966                        | 0.966                        | 0.966                        |

Notes: The dependent variable is  $\ln(\text{GDP per-capita})$  of each rural county. Column (1) reports the base-DiD results. Column (2) includes the pre- and post-treatment-year indicators to assess pre-trends,  $\text{treat}(-t)$  means the indicator for  $t$  years before treatment, while  $\text{treat}(+t)$  means the indicator for  $t$  years after treatment. The years beyond -3 and +10 are grouped into -3 and +10 respectively. Column (3) shows the results of adding the treatment-intensity variable to the base model: i.e., ratio of the consolidated-county's(ies') population to the urban-core population before consolidation; Column (4) is the result of adding to the base model the treatment-intensity variable: i.e., ratio of the consolidated-county's population to the entire prefecture's population. Robust standard errors clustered at the county level are in parentheses. \*\*\*  $p < 0.01$ , \*\*  $p < 0.05$ , \*  $p < 0.1$ .
